# Supplementary figures and images for: High wavenumber Raman spectroscopy for intraoperative assessment of breast tumour margins
Source: Royal Society of Chemistry journal article supplement (doi:10.1039/d3an00574g), 2023-01-01

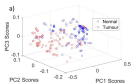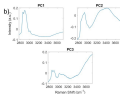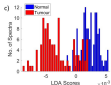

d)

| True Class | Predicted Class |        |
|------------|-----------------|--------|
|            | Normal          | Tumour |
| Normal     | 118             | 28     |
| Tumour     | 23              | 83     |

Supplement: d3an00574g3.pdf [file d3an00574g3.pdf]
